# Supplementary material for: The CRP troponin test (CTT) stratifies mortality risk in patients with non‐ST elevation myocardial infarction (NSTEMI)
Source: PubMed Central journal article supplement (PMC10976426; doi:10.1002/clc.24256), 2024-03-28

**A.**

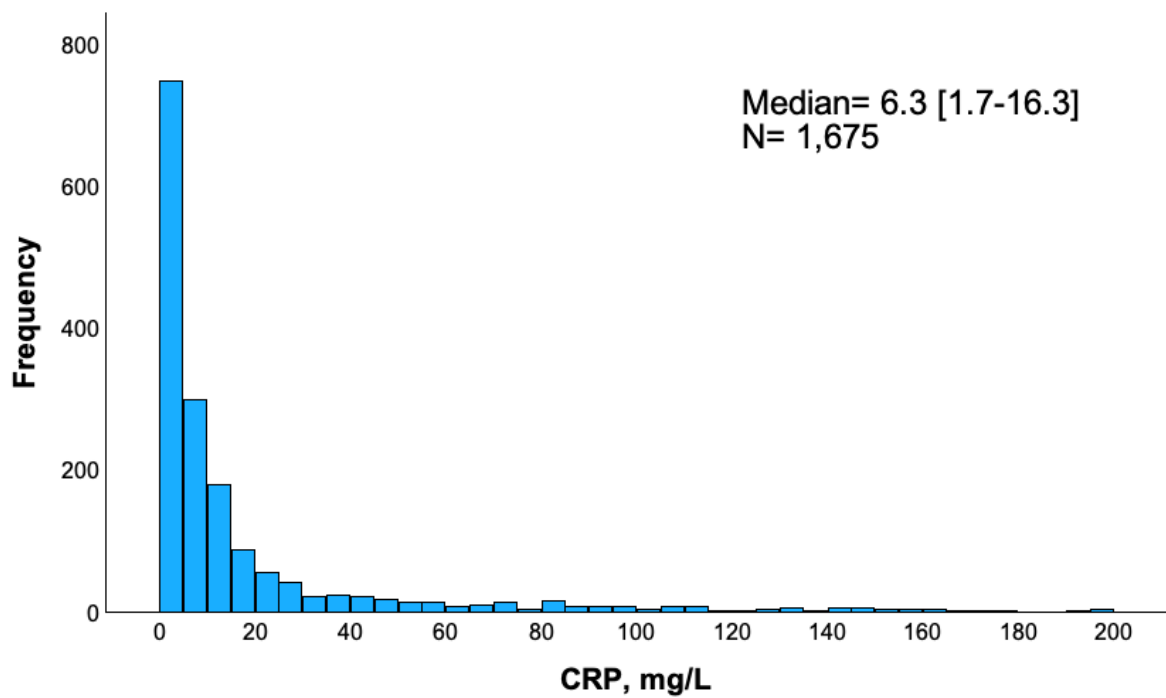

**B.**

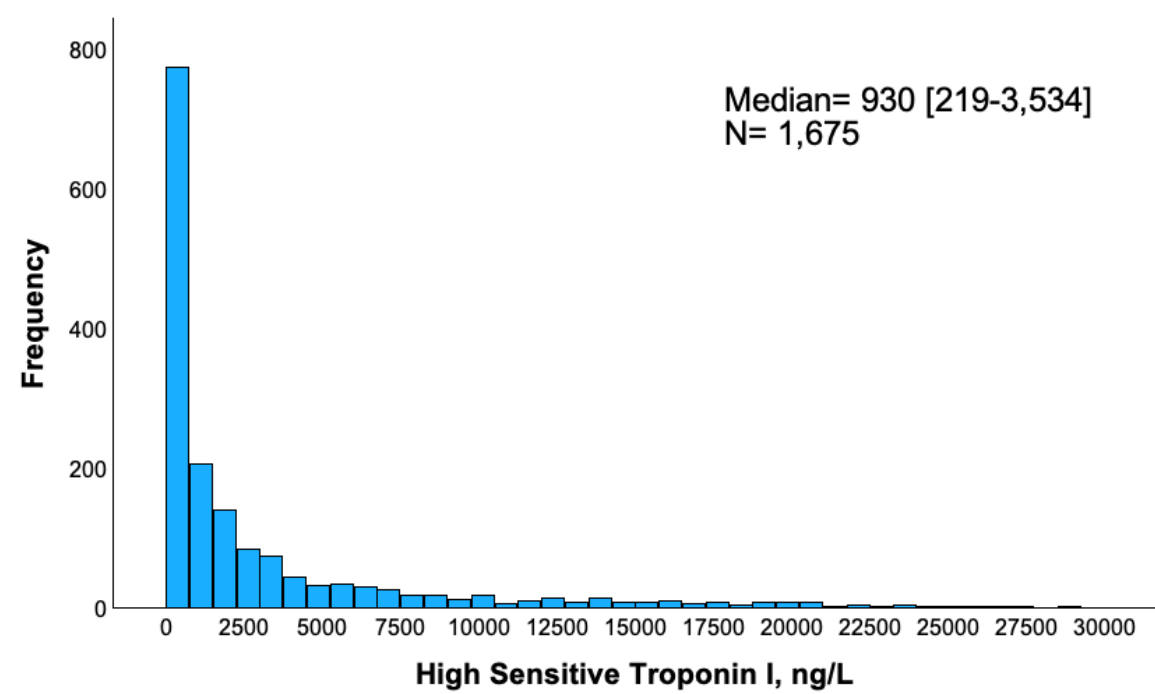

Supplement: CLC-47-e24256-s001.pdf [file CLC-47-e24256-s001.pdf]
